# Supplementary material for: Simultaneous extraction and surface enhanced Raman spectroscopy detection for the rapid and reliable identification of nicotine released from snus products
Source: Royal Society of Chemistry journal article supplement (doi:10.1039/d1ay01601f), 2021-01-01
Supplement: d1ay01601f1.pdf [file d1ay01601f1.pdf]

## **Electronic Supplementary Information (ESI\_1) *for***

### **Simultaneous extraction and surface enhanced Raman spectroscopy detection for rapid and reliable identification of nicotine release of snus products**

Yongfeng Tian,<sup>a</sup> Xianghu Tang,<sup>\*b,c</sup> Yaning Fu,<sup>d</sup> Shanzhai Shang,<sup>a</sup> Gaofeng Dong,<sup>a</sup> Tinghua Li,<sup>a</sup> Xingjiu Huang,<sup>b,c</sup> Donglai Zhu,<sup>\*a</sup>

a. Yunnan Key Laboratory of Tobacco Chemistry, Technology Center of China Tobacco Yunnan Industrial Co., Ltd., Kunming 650231, China.

b. Institute of Solid State Physics, HFIPS, Chinese Academy of Sciences, Hefei 230031, China.

c. University of Science and Technology of China, Hefei 230026, Anhui, Chinaa.

d. China National Tobacco Quality Supervision and Test Center, Zhengzhou 450001, China.

E-mail: tangxh2011@iim.ac.cn, zhudl@ynzy-tobacco.com.

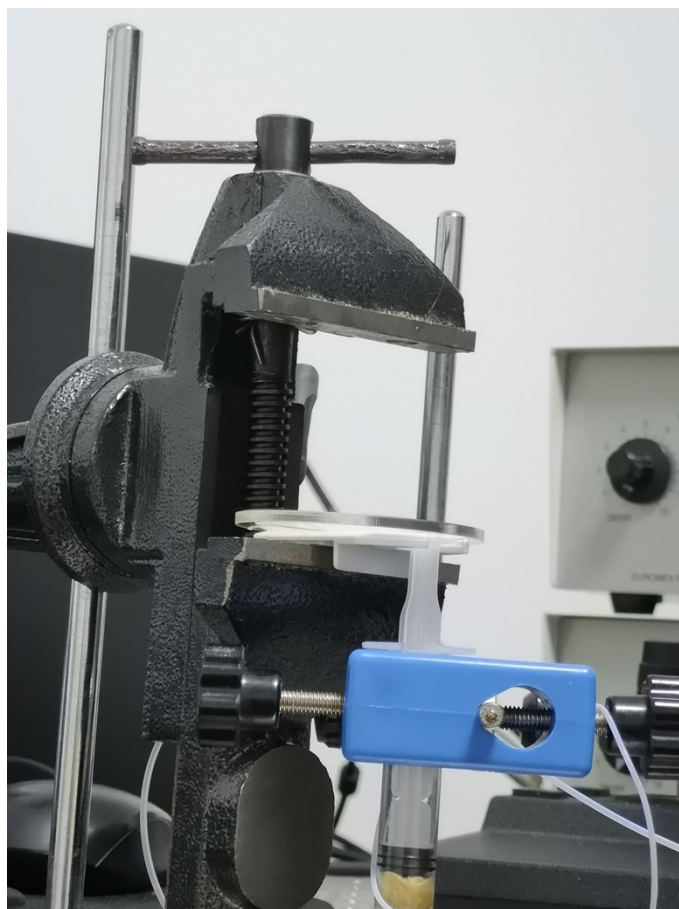

**Fig.S1** By simply simulating the opening and closing movements of the mouth and the salivary swallowing process, and based on the pump to achieve the salivary flow control, the simulated oral tobacco intake device was obtained. In other words, by turning adjustment screw clockwise or counterclockwise five times in turn to change the height of the piston pump trap, the contact between the piston and snus pouch through the pressure to achieve the simulation of the opening and closing movements of the mouth and the salivary swallowing process can be adjusted. And then take the extraction sample every min by pressure piston pump. During the actual operation, in the mechanical design of the system, screw pair drive was applied to achieve the up-and-down movement of the pump. The corresponding video can be seen in ESI\_2.

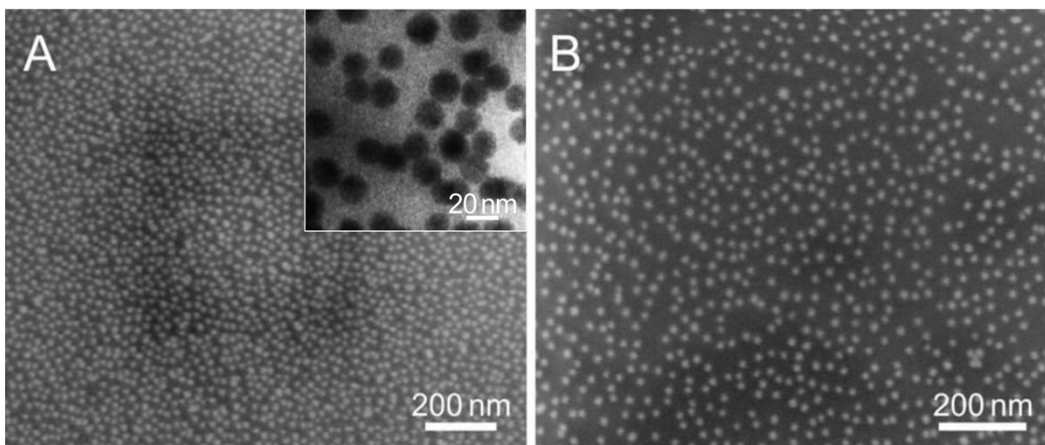

**Fig.S2** (A) Typical SEM image of initial construction of nano-Au assembly structure in the capillary and TEM image of AuNP seeds (inset). What is difficult about the construction of capillary structures loaded with AuNPs? Actually, it is very important to explore the selection of appropriate dispersant/protective system, the deployment of growth solution, and the combination of low heat treatment. Otherwise, it will cause abscission of nano-Au from capillary inner wall (B). More details of growth regulation of nano-assembly structure those are beyond the scope of this manuscript.

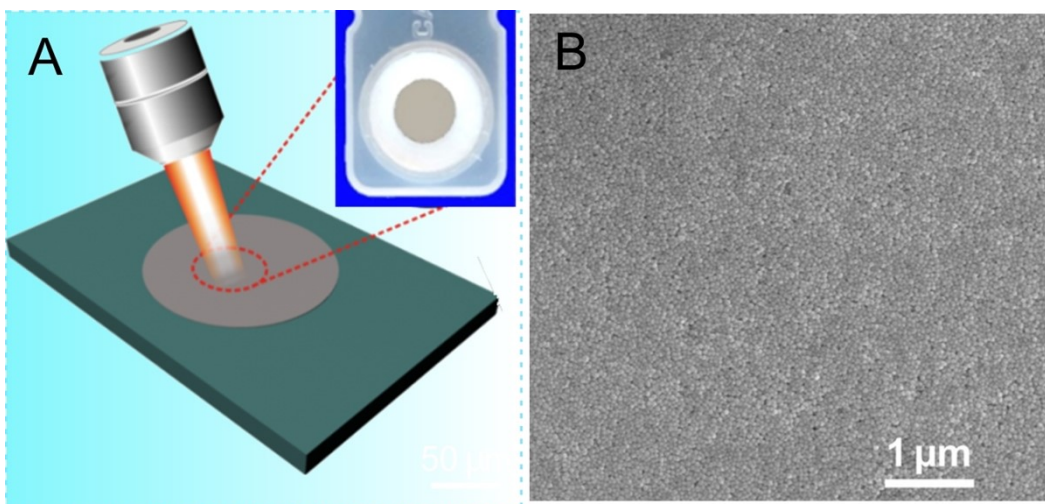

**Fig.S3** Typical solid state film forming SERS chip and SEM image.

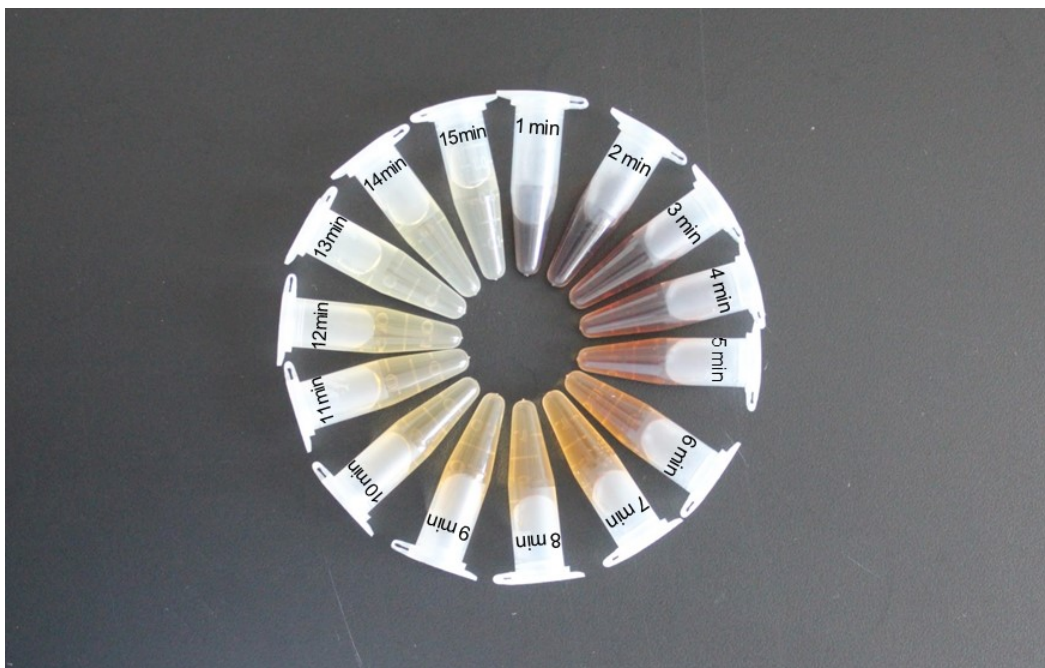

**Fig.S4** Typical digital photo of series of extracting solutions based on simulated oral tobacco intake device to obtain from snus pouch.
